# Supplementary material for: Artificial Intelligence-Assisted Processing of Anterior Segment OCT Images in the Diagnosis of Vitreoretinal Lymphoma
Source: MDPI journal article supplement (doi:10.3390/diagnostics13142451), 2023-07-23
Supplement: s1 [file s1]

# Supplementary material

## Features correlation study

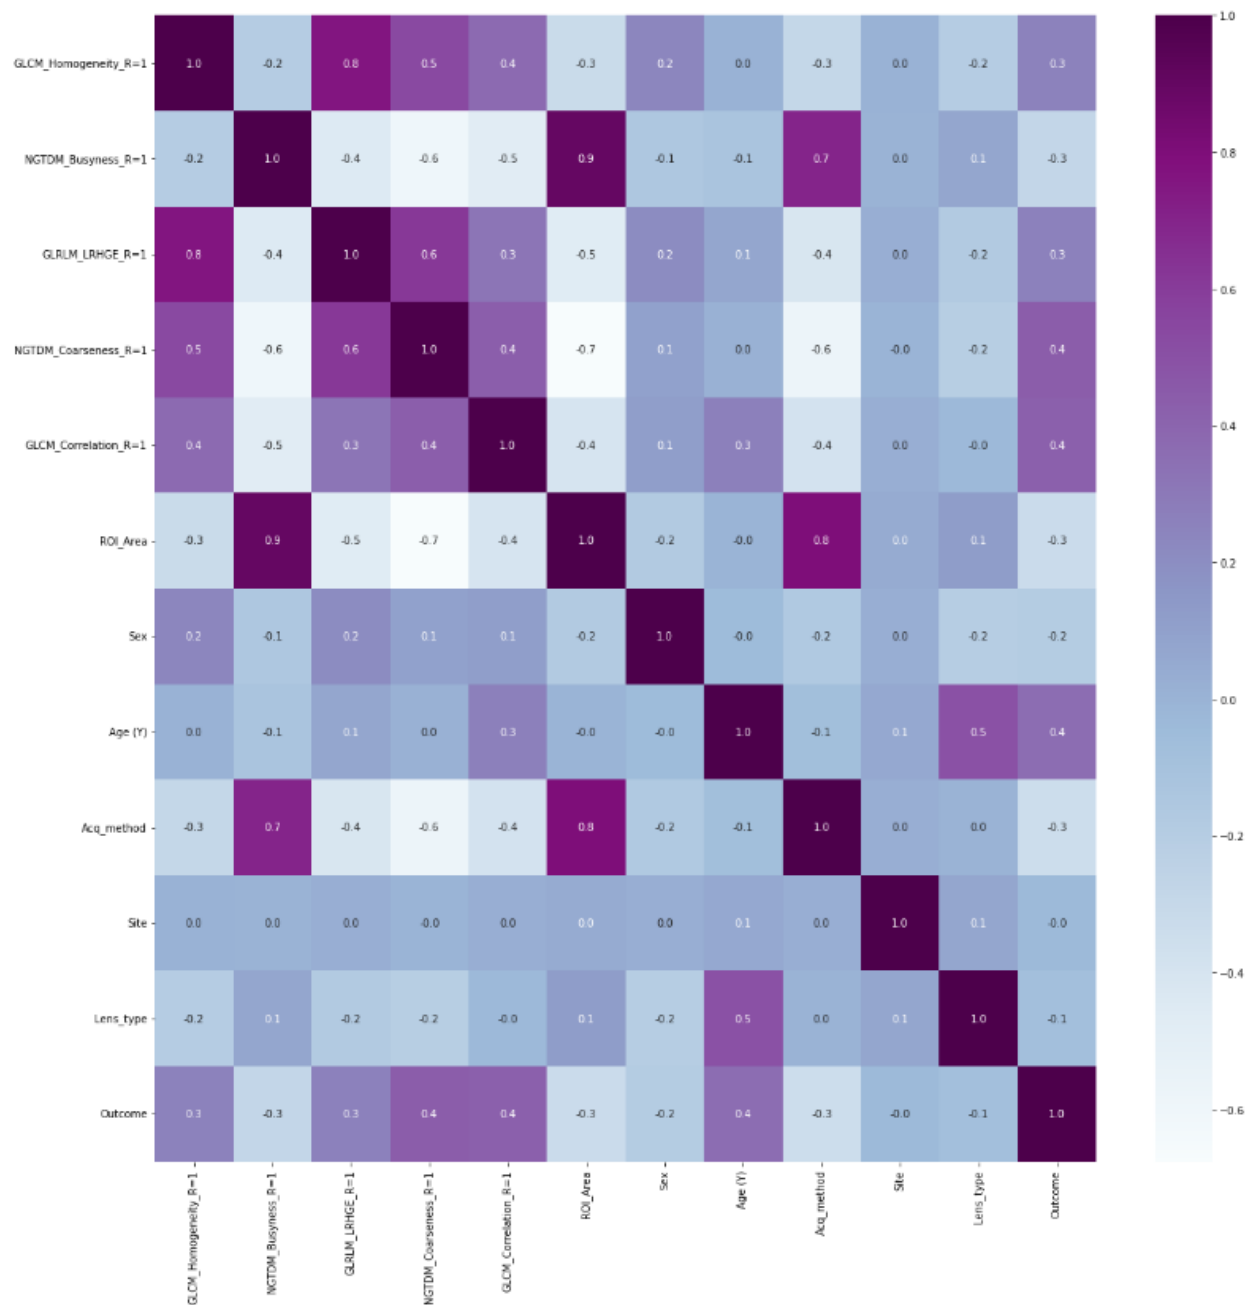

Figure S1: Pearson correlation coefficients (r) among the selected features and the other variables using 16 gray levels

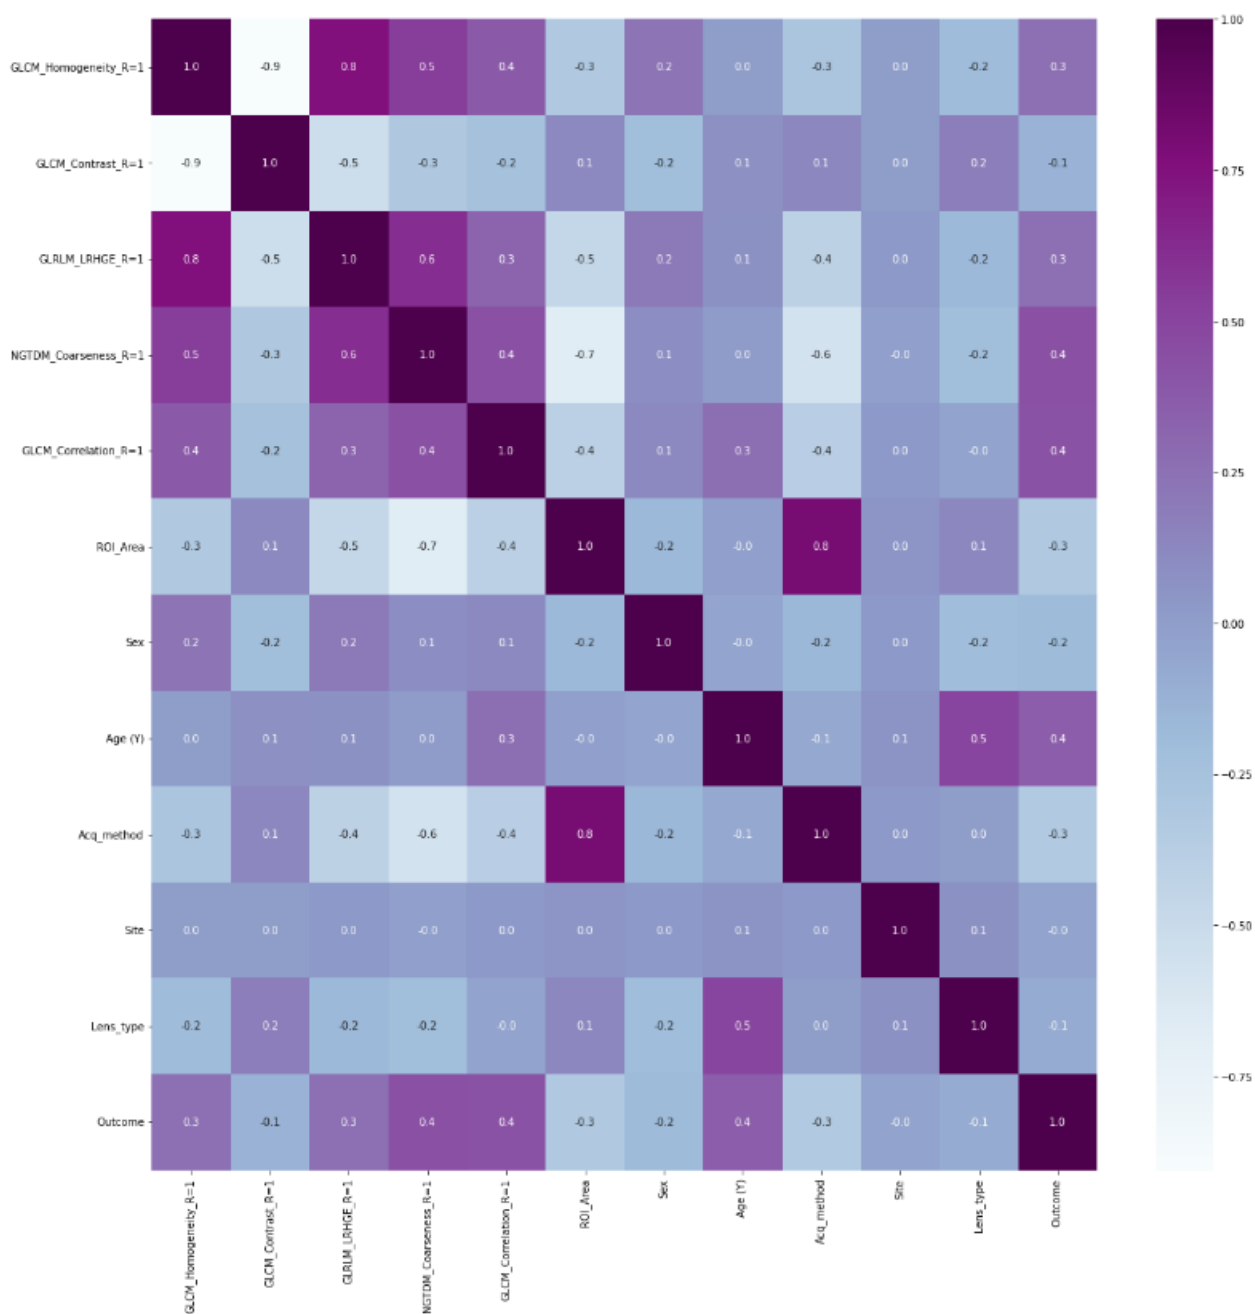

Figure S2: Pearson correlation coefficients (r) among the selected features and the other variables using 32 gray levels

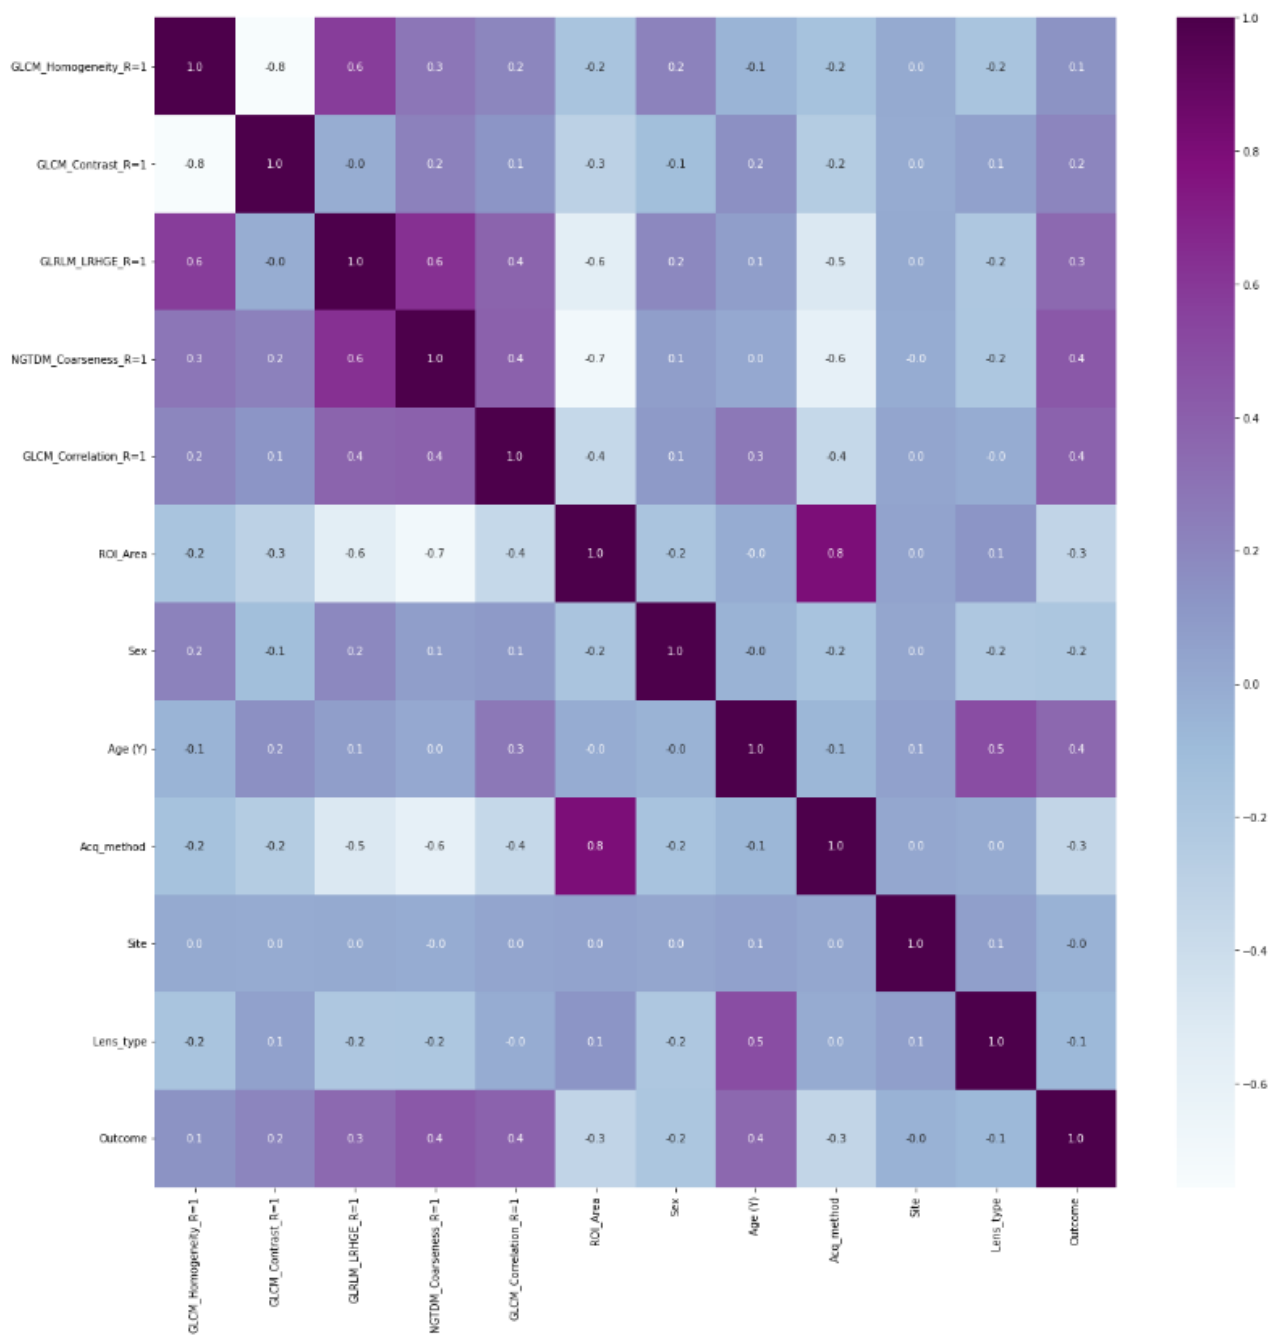

Figure S3: Pearson correlation coefficients (r) among the selected features and the other variables using 64 gray levels

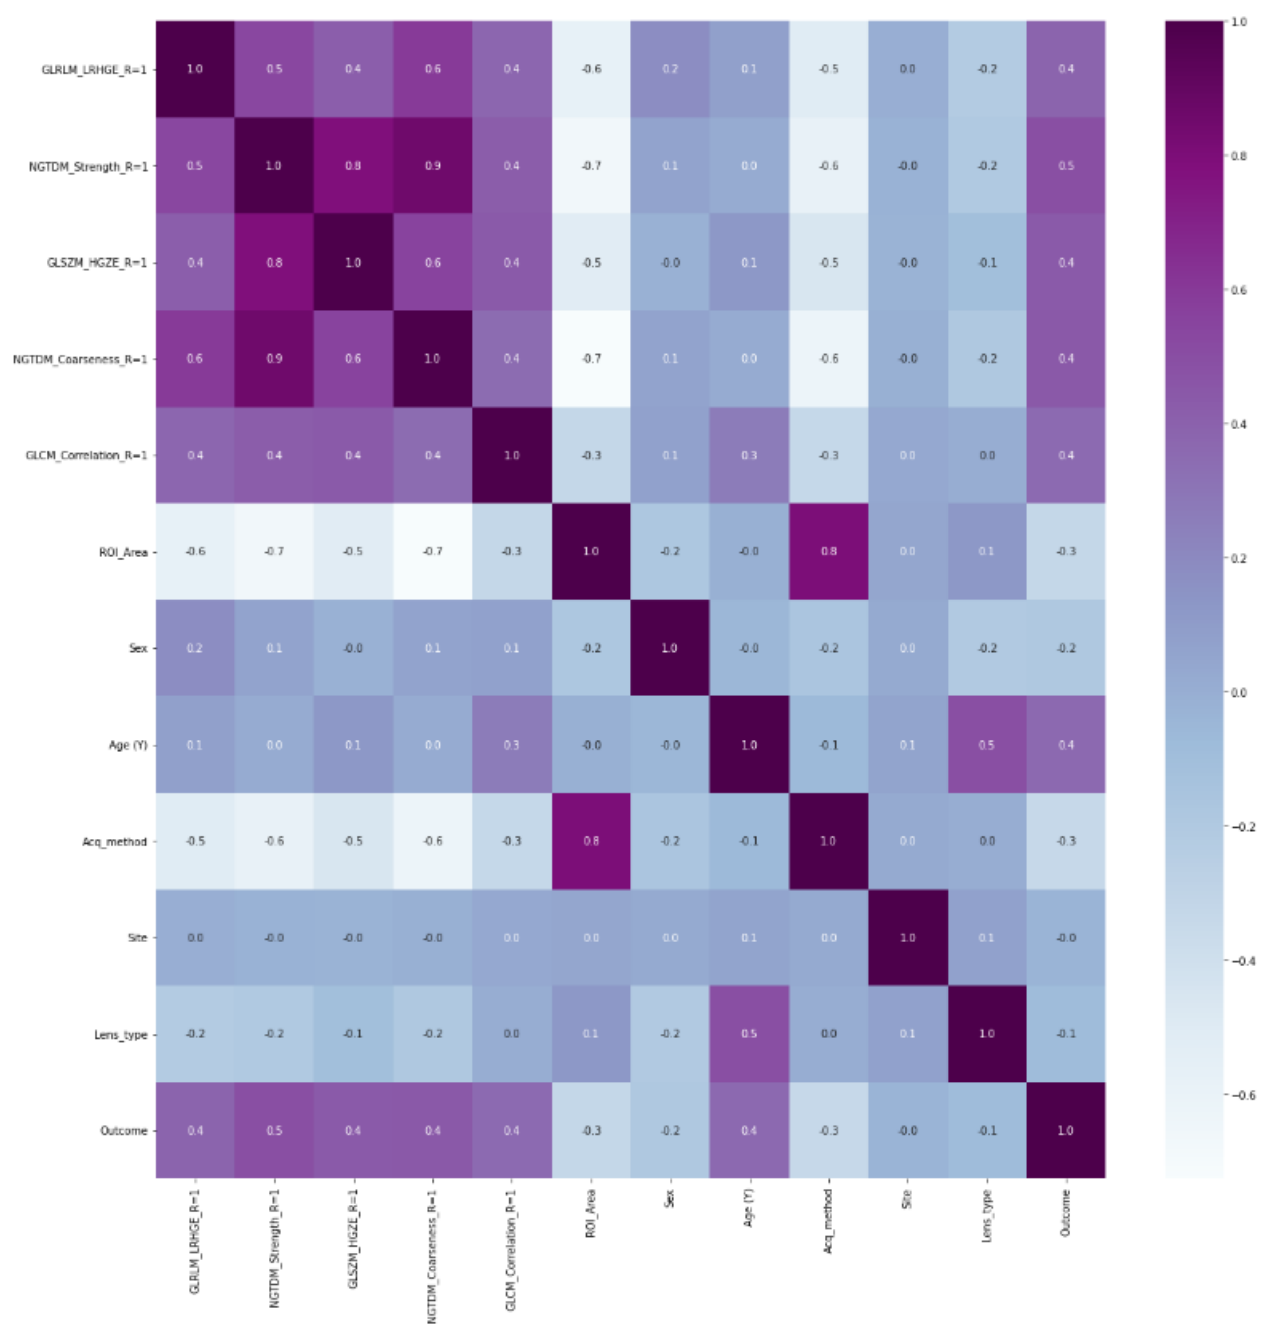

Figure S4: Pearson correlation coefficients (r) among the selected features and the other variables using 128 gray levels

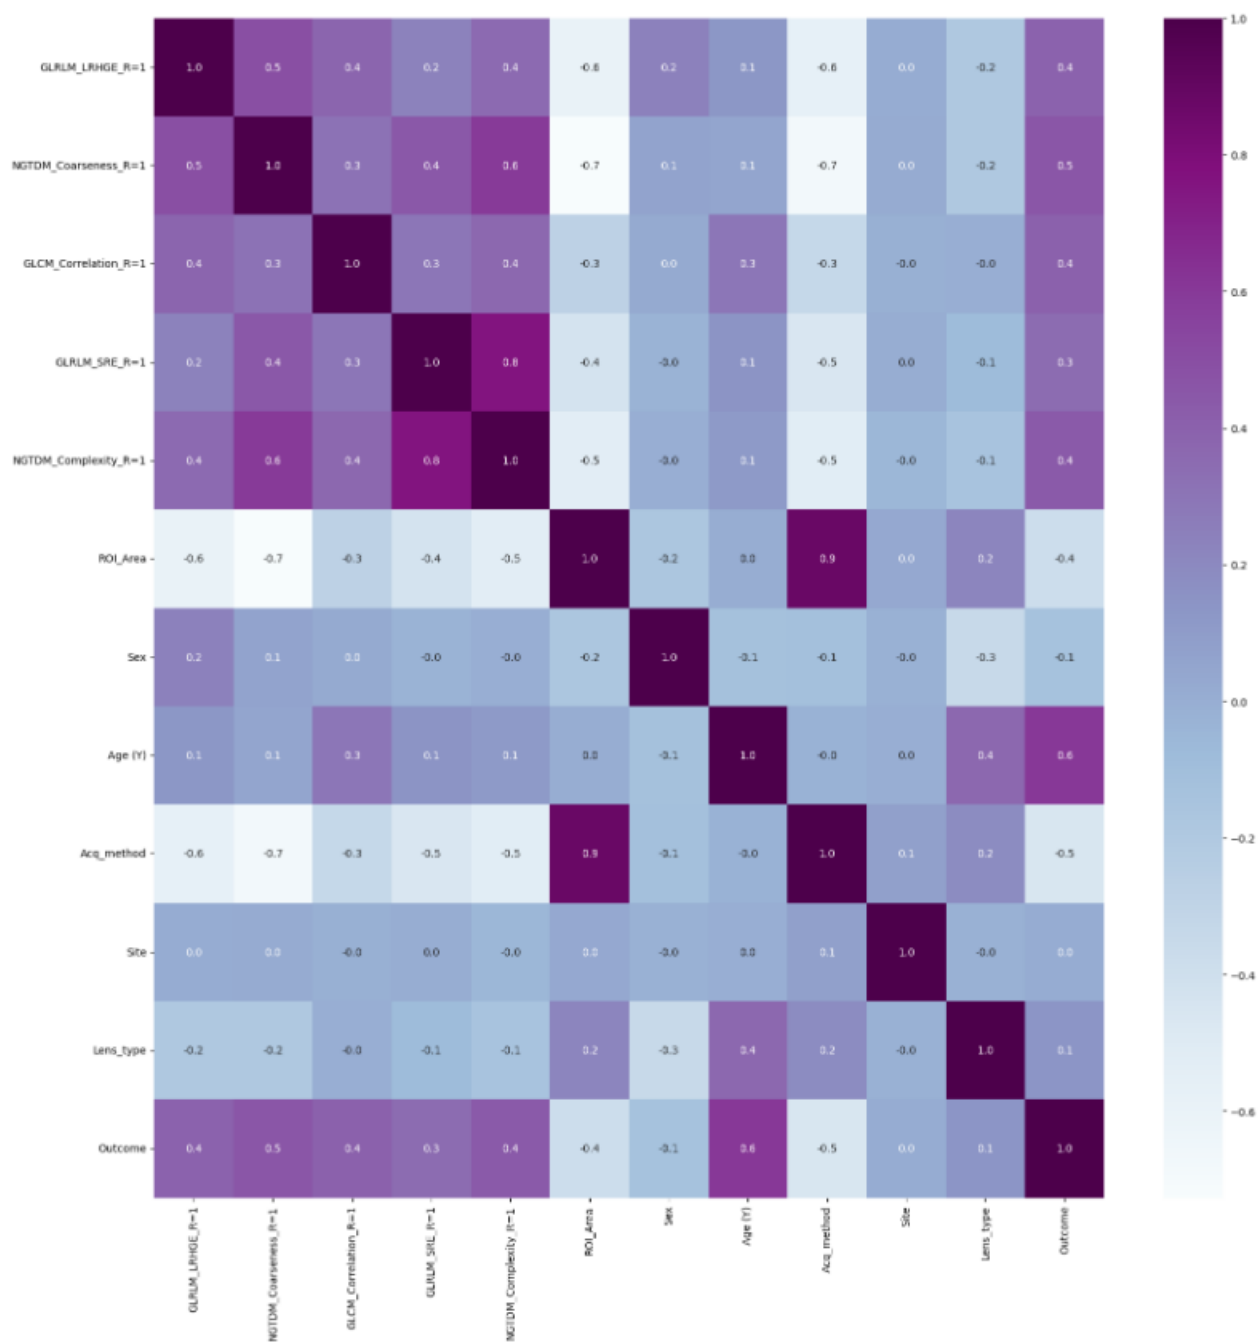

Figure S5: Pearson correlation coefficients ( $r$ ) among the selected features and the other variables using 256 gray levels

## Models results

Table S1: Model outcomes by patient in the training set. The number in brackets is the percentage of correctly detected images; if the percentage was less than 50%, there was a misclassification.

| Patient code | Model            | Model classification<br>(% of correctly detected images) | True classification | Age (Y) |
|--------------|------------------|----------------------------------------------------------|---------------------|---------|
| 173          | Dataset Ng = 16  | VRL (100%)                                               | VRL                 | 51      |
|              | Dataset Ng = 32  | VRL (97.2%)                                              |                     |         |
|              | Dataset Ng = 64  | VRL (98.6%)                                              |                     |         |
|              | Dataset Ng = 128 | VRL (98.6%)                                              |                     |         |
|              | Dataset Ng = 256 | VRL (97.2%)                                              |                     |         |
| 186          | Dataset Ng = 16  | VRL (100%)                                               | VRL                 | 58      |
|              | Dataset Ng = 32  | VRL (100%)                                               |                     |         |
|              | Dataset Ng = 64  | VRL (100%)                                               |                     |         |
|              | Dataset Ng = 128 | VRL (100%)                                               |                     |         |
|              | Dataset Ng = 256 | VRL (100%)                                               |                     |         |
| 364          | Dataset Ng = 16  | VRL (84.4%)                                              | VRL                 | 82      |
|              | Dataset Ng = 32  | VRL (78.1%)                                              |                     |         |
|              | Dataset Ng = 64  | VRL (71.9%)                                              |                     |         |
|              | Dataset Ng = 128 | VRL (81.3%)                                              |                     |         |
|              | Dataset Ng = 256 | VRL (68.8%)                                              |                     |         |
| 393          | Dataset Ng = 16  | VRL (92.9%)                                              | VRL                 | 91      |
|              | Dataset Ng = 32  | VRL (75%)                                                |                     |         |
|              | Dataset Ng = 64  | VRL (80.4%)                                              |                     |         |
|              | Dataset Ng = 128 | VRL (78.6%)                                              |                     |         |
|              | Dataset Ng = 256 | VRL (80.4%)                                              |                     |         |
| 405          | Dataset Ng = 16  | Vitritis (98.2%)                                         | Vitritis            | 38      |
|              | Dataset Ng = 32  | Vitritis (97.3%)                                         |                     |         |
|              | Dataset Ng = 64  | Vitritis (100%)                                          |                     |         |
|              | Dataset Ng = 128 | Vitritis (99.1%)                                         |                     |         |
|              | Dataset Ng = 256 | Vitritis (100%)                                          |                     |         |
| 433          | Dataset Ng = 16  | Vitritis (99.2%)                                         | Vitritis            | 26      |
|              | Dataset Ng = 32  | Vitritis (100%)                                          |                     |         |
|              | Dataset Ng = 64  | Vitritis (100%)                                          |                     |         |
|              | Dataset Ng = 128 | Vitritis (100%)                                          |                     |         |
|              | Dataset Ng = 256 | Vitritis (99.2%)                                         |                     |         |
| 434          | Dataset Ng = 16  | Vitritis (97%)                                           | Vitritis            | 57      |
|              | Dataset Ng = 32  | Vitritis (100%)                                          |                     |         |
|              | Dataset Ng = 64  | Vitritis (100%)                                          |                     |         |
|              | Dataset Ng = 128 | Vitritis (99%)                                           |                     |         |

|     |                  |                  |          |    |
|-----|------------------|------------------|----------|----|
|     | Dataset Ng = 256 | Vitritis (99%)   |          |    |
|     | Dataset Ng = 16  | Vitritis (98%)   |          |    |
|     | Dataset Ng = 32  | Vitritis (100%)  |          |    |
| 435 | Dataset Ng = 64  | Vitritis (100%)  | Vitritis | 20 |
|     | Dataset Ng = 128 | Vitritis (100%)  |          |    |
|     | Dataset Ng = 256 | Vitritis (100%)  |          |    |
|     | Dataset Ng = 16  | Vitritis (47.6%) |          |    |
|     | Dataset Ng = 32  | Vitritis (39.2%) |          |    |
| 436 | Dataset Ng = 64  | Vitritis (39.8%) | VRL      | 76 |
|     | Dataset Ng = 128 | Vitritis (39.2%) |          |    |
|     | Dataset Ng = 256 | Vitritis (38.6%) |          |    |
|     | Dataset Ng = 16  | Vitritis (99.2%) |          |    |
|     | Dataset Ng = 32  | Vitritis (100%)  |          |    |
| 439 | Dataset Ng = 64  | Vitritis (100%)  | Vitritis | 74 |
|     | Dataset Ng = 128 | Vitritis (100%)  |          |    |
|     | Dataset Ng = 256 | Vitritis (100%)  |          |    |
|     | Dataset Ng = 16  | Vitritis (95%)   |          |    |
|     | Dataset Ng = 32  | Vitritis (98%)   |          |    |
| 440 | Dataset Ng = 164 | Vitritis (98%)   | Vitritis | 50 |
|     | Dataset Ng = 128 | Vitritis (97%)   |          |    |
|     | Dataset Ng = 256 | Vitritis (98%)   |          |    |
|     | Dataset Ng = 16  | VRL (100%)       |          |    |
|     | Dataset Ng = 32  | VRL (100%)       |          |    |
| 442 | Dataset Ng = 64  | VRL (96.8%)      | VRL      | 88 |
|     | Dataset Ng = 128 | VRL (100%)       |          |    |
|     | Dataset Ng = 256 | VRL (98.4%)      |          |    |
|     | Dataset Ng = 16  | Vitritis (100%)  |          |    |
|     | Dataset Ng = 32  | Vitritis (100%)  |          |    |
| 444 | Dataset Ng = 64  | Vitritis (100%)  | Vitritis | 39 |
|     | Dataset Ng = 128 | Vitritis (99%)   |          |    |
|     | Dataset Ng = 256 | Vitritis (100%)  |          |    |
| 447 | Dataset Ng = 16  | Vitritis (44.2%) | VRL      | 94 |

|                  |                  |
|------------------|------------------|
| Dataset Ng = 32  | Vitritis (20%)   |
| Dataset Ng = 64  | Vitritis (36.8%) |
| Dataset Ng = 128 | Vitritis (37.9%) |
| Dataset Ng = 256 | Vitritis (33.7%) |

Table S2: Model outcomes by patient in the testing set. The number in brackets is the percentage of correctly detected images; if the percentage was less than 50%, there was a misclassification.

| Patient code | Model            | Model classification<br>(% of image correctly detected) | True classification | Age (Y) |
|--------------|------------------|---------------------------------------------------------|---------------------|---------|
| 103          | Dataset Ng = 16  | VRL (100%)                                              | VRL                 | 55      |
|              | Dataset Ng = 32  | VRL (100%)                                              |                     |         |
|              | Dataset Ng = 64  | VRL (100%)                                              |                     |         |
|              | Dataset Ng = 128 | VRL (100%)                                              |                     |         |
|              | Dataset Ng = 256 | VRL(100%)                                               |                     |         |
| 363          | Dataset Ng = 16  | VRL (100%)                                              | VRL                 | 71      |
|              | Dataset Ng = 32  | VRL (100%)                                              |                     |         |
|              | Dataset Ng = 64  | VRL (100%)                                              |                     |         |
|              | Dataset Ng = 128 | VRL (100%)                                              |                     |         |
|              | Dataset Ng = 256 | VRL(100%)                                               |                     |         |
| 398          | Dataset Ng = 16  | VRL (100%)                                              | VRL                 | 58      |
|              | Dataset Ng = 32  | VRL (100%)                                              |                     |         |
|              | Dataset Ng = 64  | VRL (100%)                                              |                     |         |
|              | Dataset Ng = 128 | VRL (100%)                                              |                     |         |
|              | Dataset Ng = 256 | VRL(100%)                                               |                     |         |
| 410          | Dataset Ng = 16  | VRL (24.8%)                                             | Vitritis            | 79      |
|              | Dataset Ng = 32  | VRL (35.8%)                                             |                     |         |
|              | Dataset Ng = 64  | VRL (28.8%)                                             |                     |         |
|              | Dataset Ng = 128 | VRL (49.6%)                                             |                     |         |
|              | Dataset Ng = 256 | Vitritis (54.2%)                                        |                     |         |
| 432          | Dataset Ng = 16  | Vitritis (25.7%)                                        | VRL                 | 73      |
|              | Dataset Ng = 32  | Vitritis (31%)                                          |                     |         |
|              | Dataset Ng = 64  | Vitritis (28.8%)                                        |                     |         |
|              | Dataset Ng = 128 | Vitritis (34.1%)                                        |                     |         |
|              | Dataset Ng = 256 | Vitritis (31.8%)                                        |                     |         |
| 437          | Dataset Ng = 16  | Vitritis (81.2%)                                        | Vitritis            | 26      |
|              | Dataset Ng = 32  | Vitritis (81.6%)                                        |                     |         |
|              | Dataset Ng = 64  | Vitritis (82.5%)                                        |                     |         |
|              | Dataset Ng = 128 | Vitritis (84.6%)                                        |                     |         |
|              | Dataset Ng = 256 | Vitritis (82.8%)                                        |                     |         |
| 438          | Dataset Ng = 16  | Vitritis (89.5%)                                        | Vitritis            | 46      |
|              | Dataset Ng = 32  | Vitritis (90.5%)                                        |                     |         |
|              | Dataset Ng = 64  | Vitritis (93.7%)                                        |                     |         |



|     |                  |                   |          |    |
|-----|------------------|-------------------|----------|----|
|     | Dataset Ng = 128 | Vitritis (92.7%)  |          |    |
|     | Dataset Ng = 256 | Vitritis (93.7%)  |          |    |
| 445 | Dataset Ng = 16  | Vitritis (83.5%)  |          |    |
|     | Dataset Ng = 32  | Vitritis (83.3%)  |          |    |
|     | Dataset Ng = 64  | Vitritis (83.4%)  | Vitritis | 52 |
|     | Dataset Ng = 128 | Vitritis (76.4%)  |          |    |
|     | Dataset Ng = 256 | Vitritis (80%)    |          |    |
| 448 | Dataset Ng = 16  | Vitritis (83.5%)  |          |    |
|     | Dataset Ng = 32  | Vitritis (76.5%)  |          |    |
|     | Dataset Ng = 64  | Vitritis (77%)    | Vitritis | 65 |
|     | Dataset Ng = 128 | Vitritis (76.4%)  |          |    |
|     | Dataset Ng = 256 | Vitritis (77%)    |          |    |
| 446 | Dataset Ng = 16  | Vitritis (81%)    |          |    |
|     | Dataset Ng = 32  | Vitritis (78.2%)  |          |    |
|     | Dataset Ng = 64  | Vitritis (88.2%)  | Vitritis | 66 |
|     | Dataset Ng = 128 | Vitritis (81.8%)  |          |    |
|     | Dataset Ng = 256 | Vitritis (85%)    |          |    |
| 466 | Dataset Ng = 16  | Vitritis (72.3%)  |          |    |
|     | Dataset Ng = 32  | Vitritis (76.7%)  |          |    |
|     | Dataset Ng = 164 | Vitritis (72.3%)  | Vitritis | 62 |
|     | Dataset Ng = 128 | Vitritis (76%)    |          |    |
|     | Dataset Ng = 256 | Vitritis (76%)    |          |    |
| 468 | Dataset Ng = 16  | VRL (22.6%)       |          |    |
|     | Dataset Ng = 32  | Vitritis (50%)    |          |    |
|     | Dataset Ng = 64  | VRL (45.2%)       | Vitritis | 78 |
|     | Dataset Ng = 128 | VRL (44.4%)       |          |    |
|     | Dataset Ng = 256 | VRL (40.3%)       |          |    |
| 491 | Dataset Ng = 16  | Vitritis (75.3%)  |          |    |
|     | Dataset Ng = 32  | Vitritis (79.3%)  |          |    |
|     | Dataset Ng = 64  | Vitritis (80.5%)  | Vitritis | 75 |
|     | Dataset Ng = 128 | Vitritis (80%)    |          |    |
|     | Dataset Ng = 256 | Vitritis (82.6%)  |          |    |
| 493 | Dataset Ng = 16  | Vitritis (79.5%)  |          |    |
|     | Dataset Ng = 32  | Vitritis (83.3%)  |          |    |
|     | Dataset Ng = 64  | Vitritis (88.3%)  | Vitritis | 79 |
|     | Dataset Ng = 128 | Vitritis (86.3%)  |          |    |
|     | Dataset Ng = 256 | Vitritis (91.2 %) |          |    |

Table S3: Model classification by patient and eye site. Y: Yes, i.e., correctly classified eye. N: No, i.e., misclassified eye

| Patient code | Age (y) | Training or testing set | Eye site | Model Ng = 16          |                              | Model Ng = 32          |                              | Model Ng = 64          |                              | Model Ng = 128         |                              | Model Ng = 256         |                              |
|--------------|---------|-------------------------|----------|------------------------|------------------------------|------------------------|------------------------------|------------------------|------------------------------|------------------------|------------------------------|------------------------|------------------------------|
|              |         |                         |          | Eye correctly classify | Patient correctly classified |
| 103          | 55      | Testing                 | L<br>R   | Y<br>Y                 | Y                            |
| 173          | 51      | Training                | L<br>R   | Y<br>Y                 | Y                            |
| 186          | 58      | Training                | L        | Y                      | Y                            | Y                      | Y                            | Y                      | Y                            | Y                      | Y                            | Y                      | Y                            |
| 363          | 71      | Testing                 | L<br>R   | Y<br>Y                 | Y                            |
| 364          | 82      | Training                | R        | Y                      | Y                            | Y                      | Y                            | Y                      | Y                            | Y                      | Y                            | Y                      | Y                            |
| 393          | 91      | Training                | L<br>R   | Y<br>Y                 | Y                            |
| 398          | 58      | Testing                 | L<br>R   | Y<br>Y                 | Y                            |
| 405          | 38      | Training                | R        | N                      | N                            | N                      | N                            | Y                      | Y                            | Y                      | Y                            | Y                      | Y                            |
| 410          | 79      | Testing                 | L<br>R   | N<br>N                 | N                            | N<br>Y                 | N                            | N<br>Y                 | N                            | N<br>Y                 | N                            | N<br>Y                 | N                            |
| 432          | 73      | Testing                 | L<br>R   | N<br>N                 | N                            | N<br>Y                 | N                            | N<br>Y                 | N                            | N<br>N                 | N                            | N<br>N                 | N                            |
| 433          | 26      | Training                | L<br>R   | Y<br>Y                 | Y                            |
| 434          | 57      | Training                | L<br>R   | Y<br>Y                 | Y                            |
| 435          | 20      | Training                | L<br>R   | Y<br>Y                 | Y                            |
| 436          | 76      | Training                | L<br>R   | N<br>N                 | N                            | N<br>N                 | N                            | Y<br>N                 | N                            | Y<br>N                 | N                            | N<br>N                 | N                            |

|     |    |          |   |           |           |           |           |           |           |           |           |           |
|-----|----|----------|---|-----------|-----------|-----------|-----------|-----------|-----------|-----------|-----------|-----------|
| 437 | 26 | Testing  | L | Y         | Y         | Y         | Y         | Y         | Y         | Y         | Y         | Y         |
|     |    |          | R | Y         |           | Y         | Y         | Y         |           | Y         | Y         | Y         |
| 438 | 46 | Testing  | L | Y         | Y         | Y         | Y         | Y         | Y         | Y         | Y         | Y         |
|     |    |          | R | Y         |           | N         | Y         | Y         | Y         | Y         | Y         | Y         |
| 439 | 74 | Training | L | Y         | Y         | Y         | Y         | Y         | Y         | Y         | Y         | Y         |
|     |    |          | R | Y         | Y         | Y         | Y         | Y         | Y         | Y         | Y         | Y         |
| 440 | 50 | Training | L | Y         | Y         | Y         | Y         | Y         | Y         | Y         | Y         | Y         |
| 442 | 88 | Training | L | N         | N         | Y         | Y         | Y         | Y         | Y         | Y         | Y         |
|     |    |          | R | N         |           | Y         | Y         | Y         | Y         | Y         | Y         | Y         |
| 444 | 39 | Training | L | Y         | Y         | Y         | Y         | Y         | Y         | Y         | Y         | Y         |
| 445 | 52 | Testing  | L | Y         | Y         | Y         | Y         | Y         | Y         | Y         | Y         | Y         |
|     |    |          | R | Y         | Y         | Y         | Y         | Y         | Y         | Y         | Y         | Y         |
| 446 | 66 | Testing  | L | Y         | Y         | Y         | Y         | Y         | Y         | Y         | Y         | Y         |
| 447 | 94 | Training | R | N         | N         | N         | N         | Y         | Y         | N         | N         | N         |
| 448 | 65 | Testing  | L | Y         | Y         | Y         | Y         | Y         | Y         | Y         | Y         | Y         |
|     |    |          | R | Y         |           | Y         | Y         | Y         | Y         | Y         | Y         | Y         |
| 466 | 62 | Testing  | R | Y         | Y         | Y         | Y         | Y         | Y         | Y         | Y         | Y         |
| 468 | 78 | Testing  | L | N         | N         | Y         | N         | Y         | N         | Y         | N         | N         |
|     |    |          | R | N         |           | N         | N         | N         | N         | N         | N         | N         |
| 491 | 75 | Testing  | L | Y         | Y         | Y         | Y         | Y         | Y         | Y         | Y         | Y         |
|     |    |          | R | Y         |           | Y         | Y         | Y         | Y         | Y         | Y         | Y         |
| 493 | 79 | Testing  | L | Y         | Y         | Y         | Y         | Y         | Y         | Y         | Y         | Y         |
|     |    |          |   | %         | %         | %         | %         | %         | %         | %         | %         | %         |
|     |    |          |   | corrected |
|     |    |          |   | eye       | patients  | eye       | patients  | eye       | patients  | eye       | patients  | patients  |
|     |    |          |   | detected  |
|     |    |          |   | 72%       | 75%       | 83%       | 79%       | 91%       | 89%       | 87%       | 82%       | 82%       |

Models' ROC curves

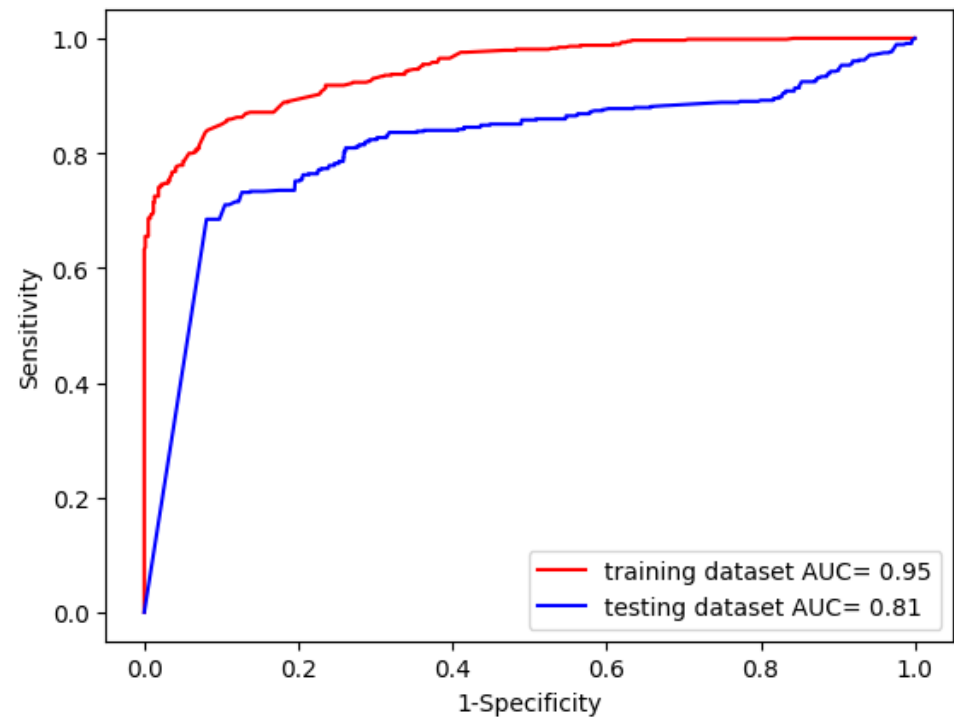

Figure S6: ROC curves obtained in training and testing sets with relative AUCs for model using “Dataset Ng = 16”.

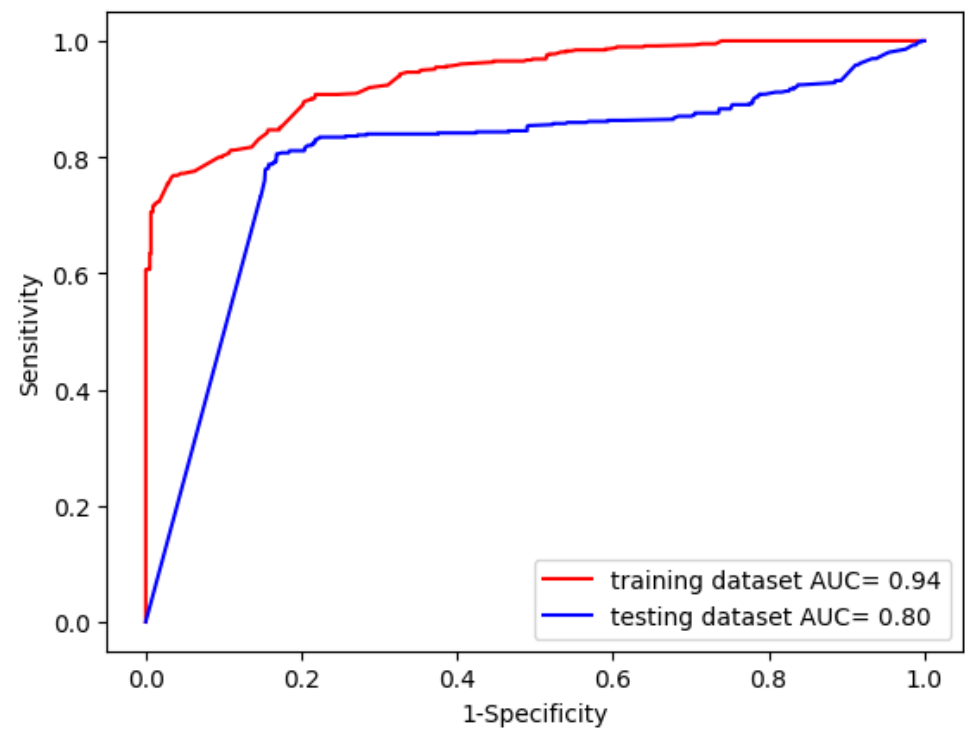

Figure S7: ROC curves obtained in training and testing sets with relative AUCs for model using “Dataset Ng = 32”.

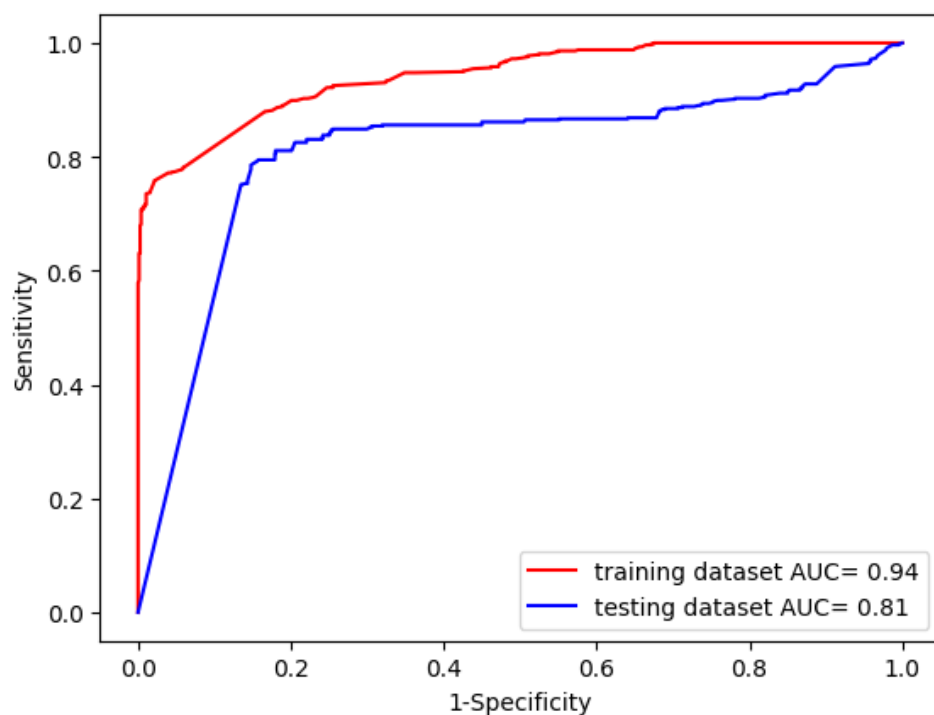

Figure S8: ROC curves obtained in training and testing sets with relative AUCs for model using “Dataset Ng = 64”.

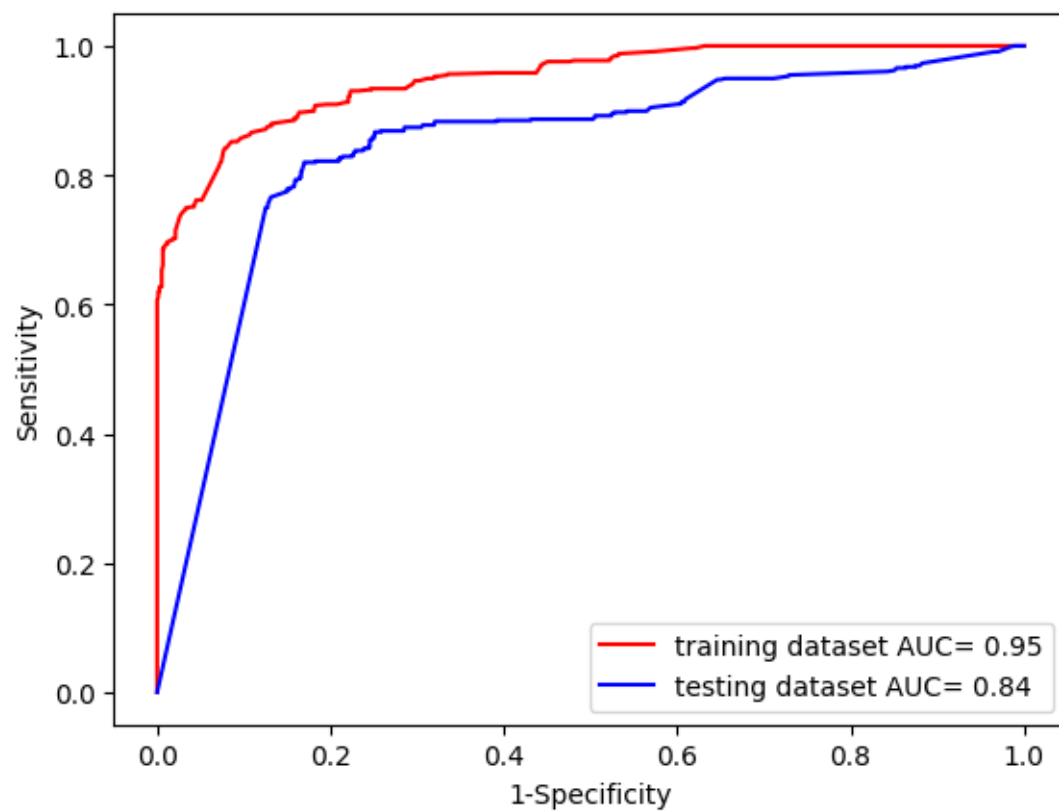

Figure S9: ROC curves obtained in training and testing sets with relative AUCs for model using “Dataset Ng = 128”.

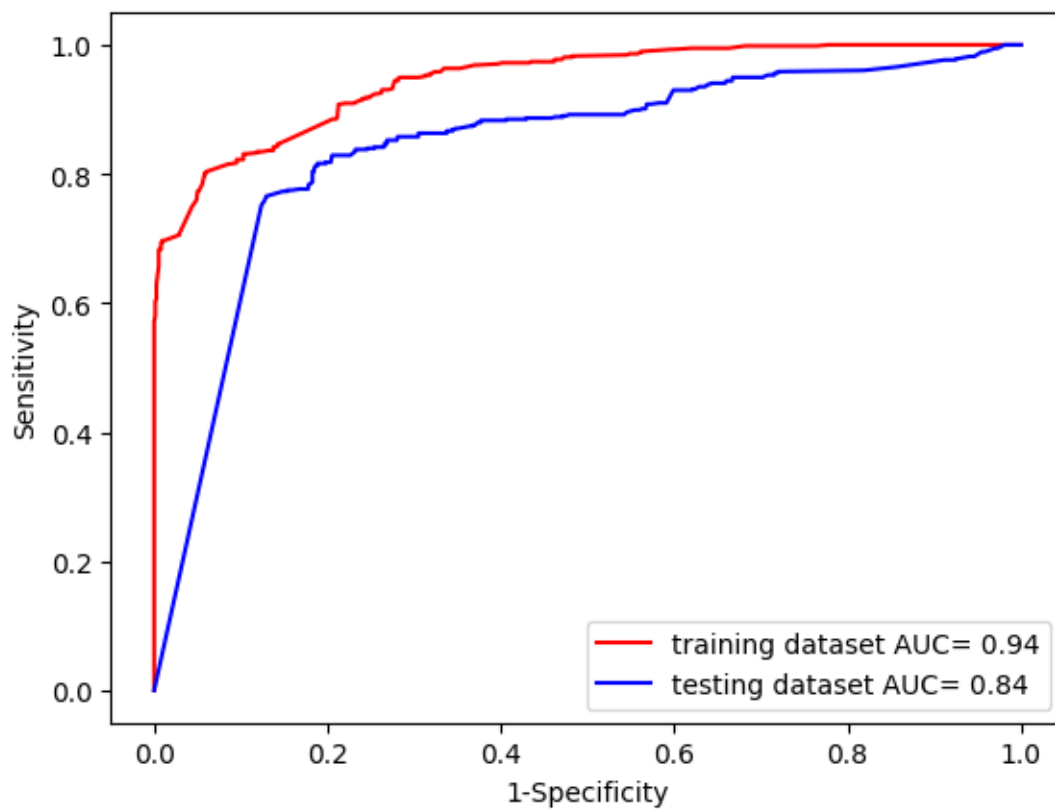

Figure S10: ROC curves obtained in training and testing sets with relative AUCs for model using “Dataset Ng = 256”.
